# Supplementary material
Source: PubMed Central journal article supplement (PMC6874499)
Supplement: EMS84511-supplement-1.pdf [file EMS84511-supplement-1.pdf]

**Supplementary Figure 1. Source gel images**

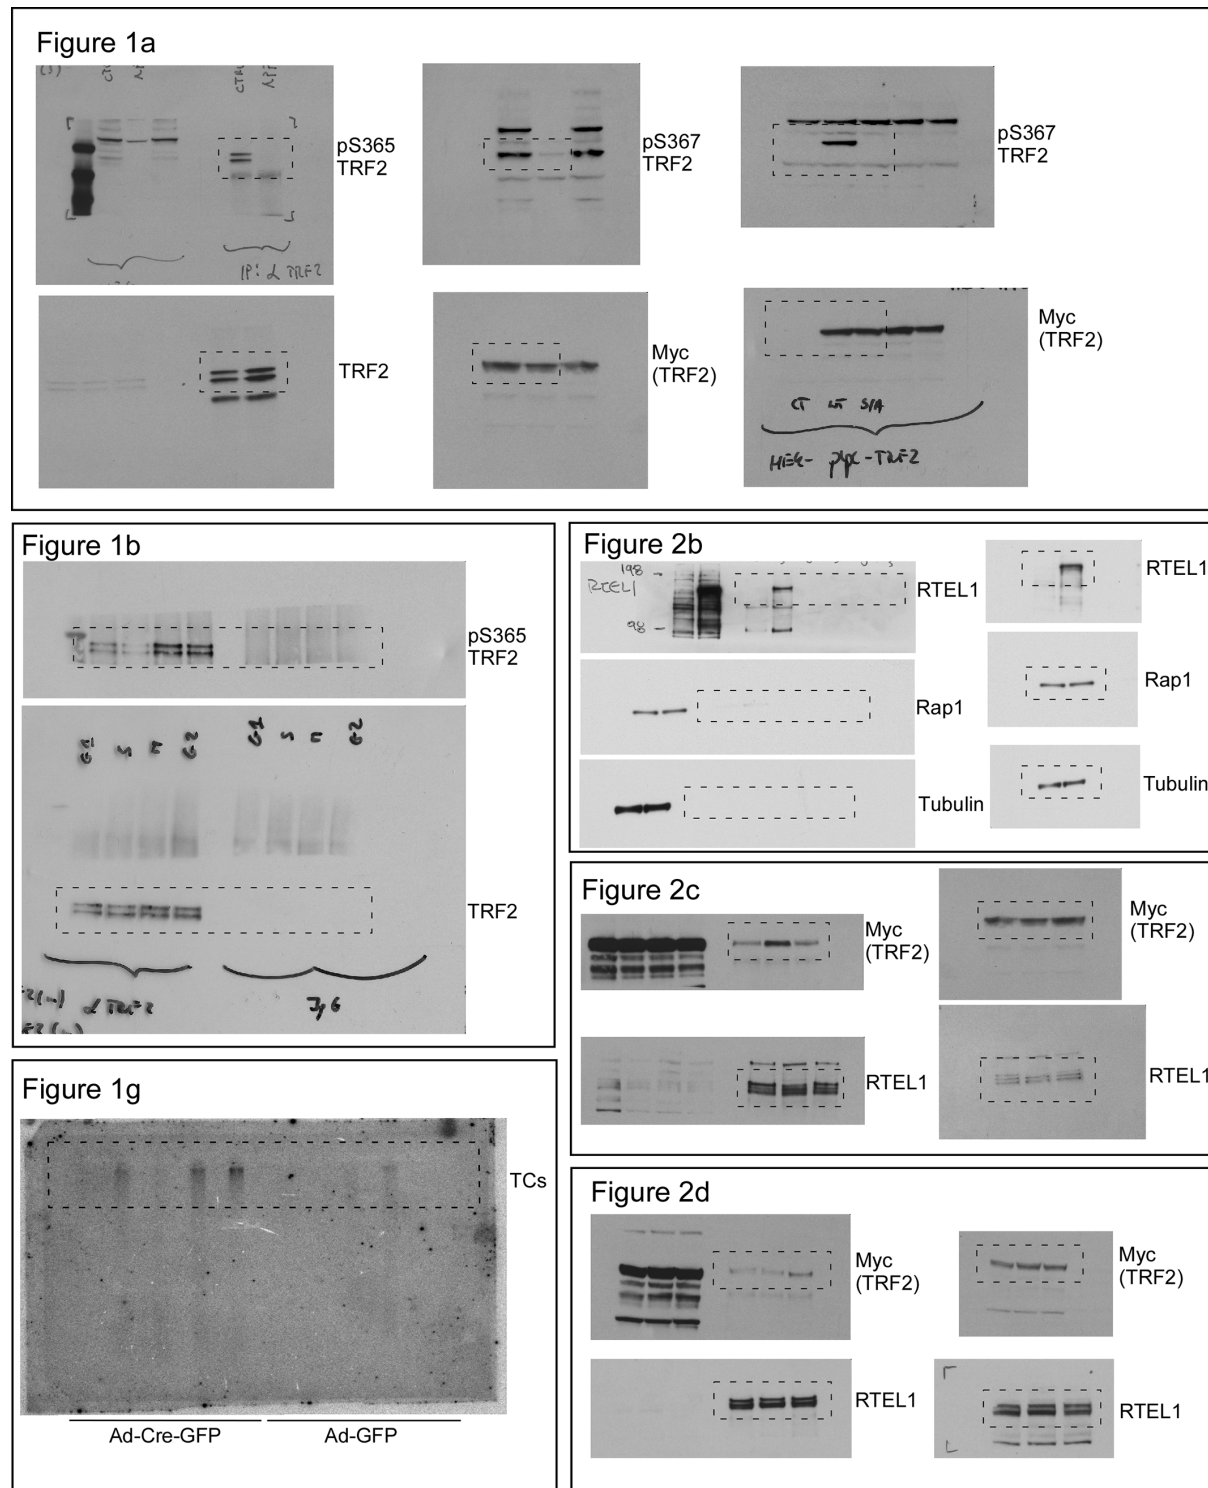

Figure 2e

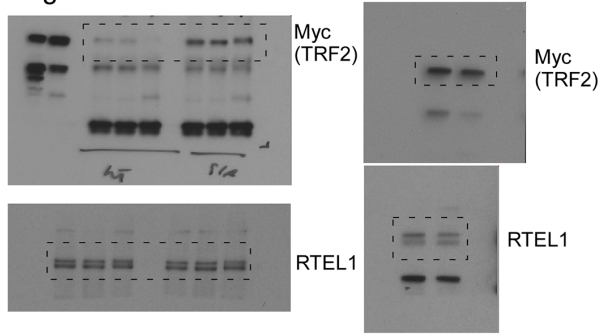

Figure 2h

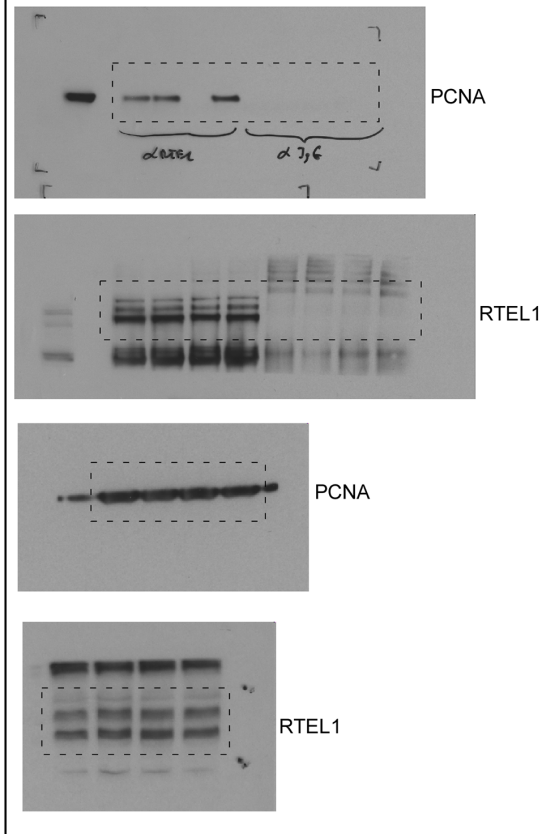

Figure 2f

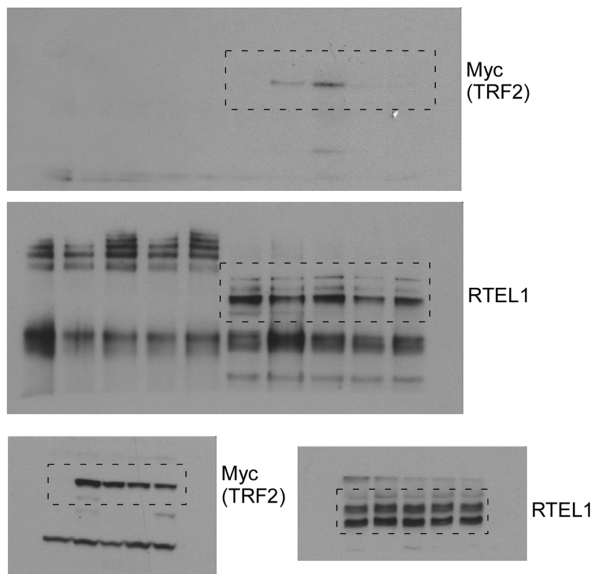

Figure 4a

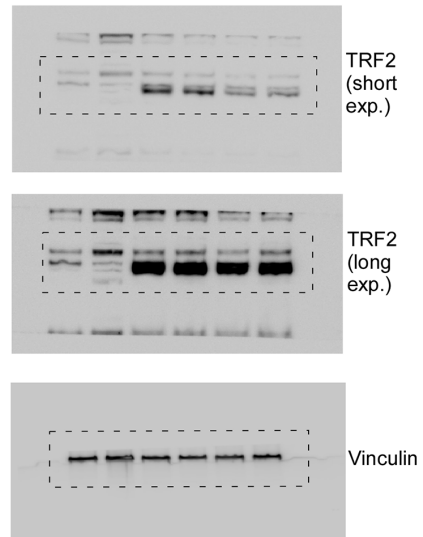

Figure 3b

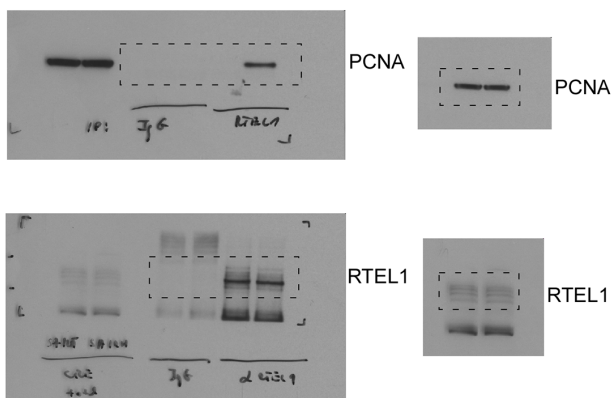

Extended data fig. 1b

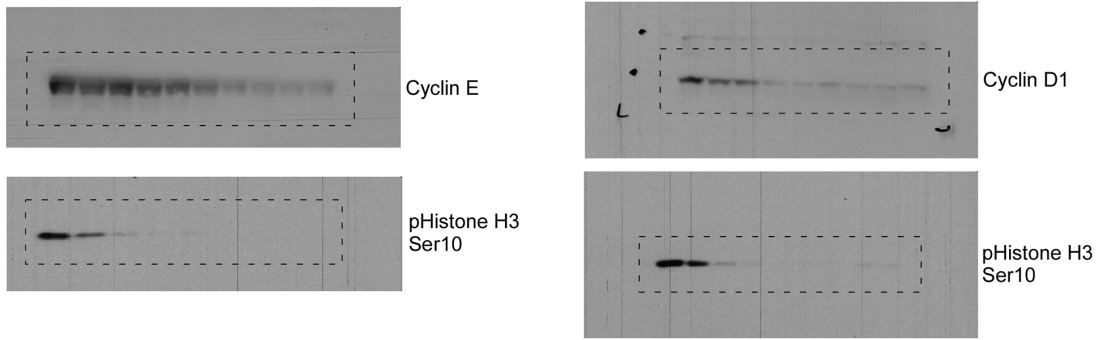

Extended data fig. 1c

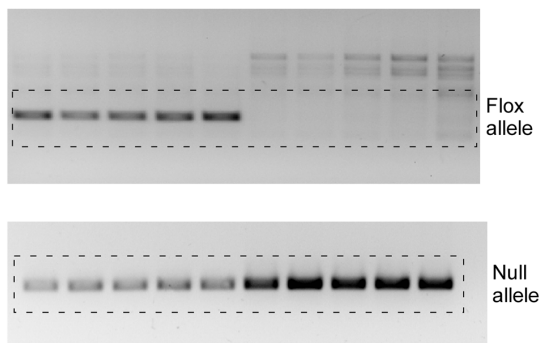

Extended data fig. 1d

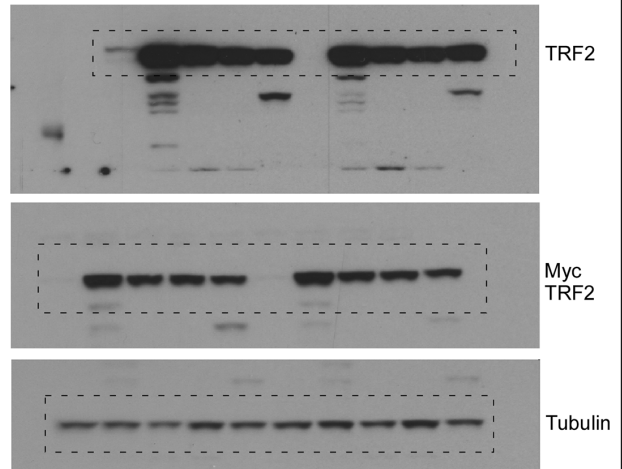

Extended data fig. 2a

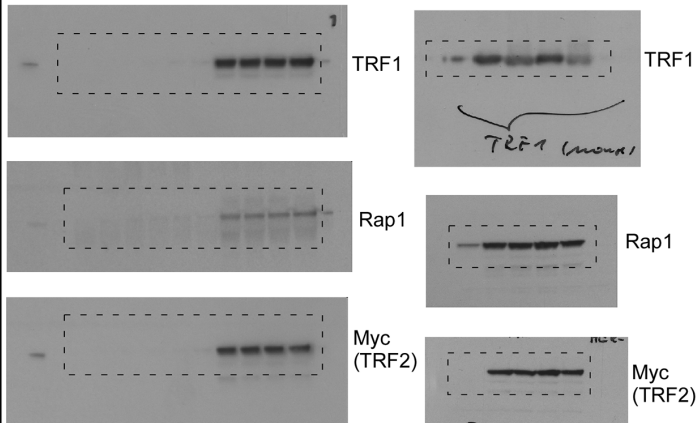

Extended data fig. 2b

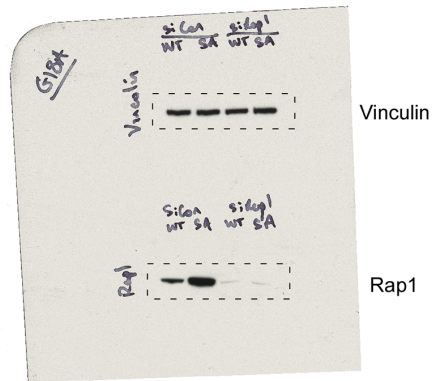

Extended data fig. 3a

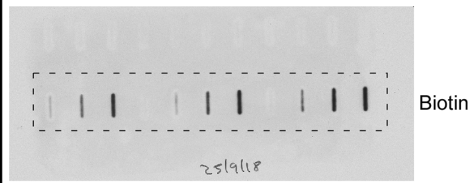

Extended data fig. 3b

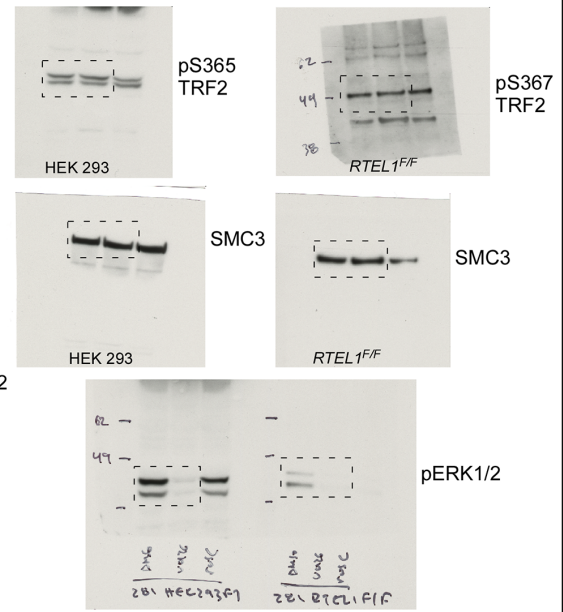

Extended data fig. 4b

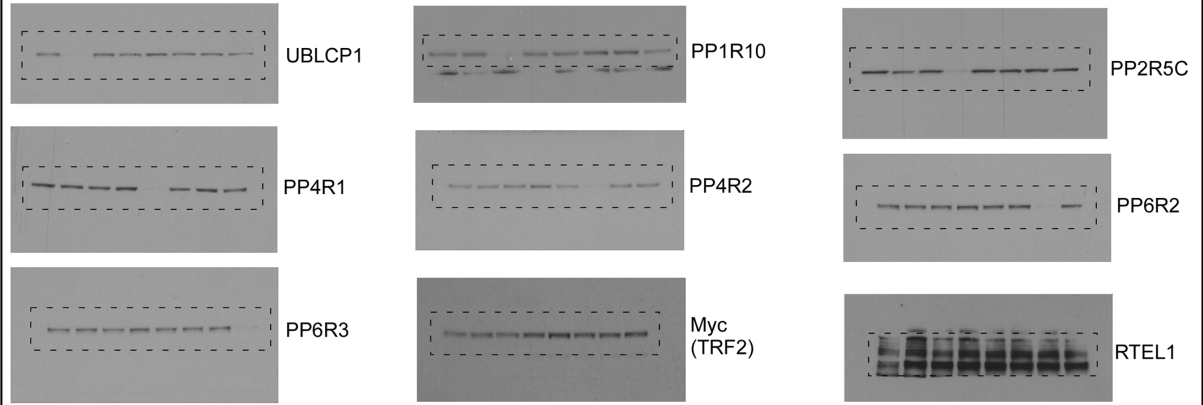

Extended data fig. 4c

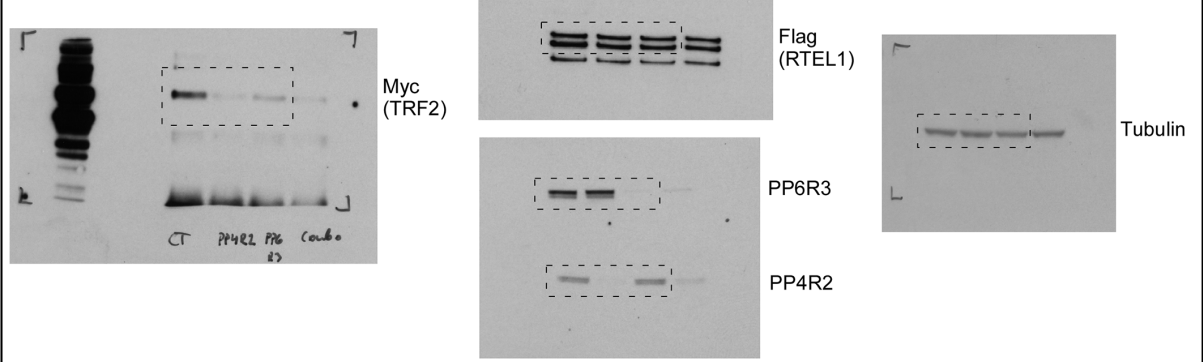

Extended data fig. 4d

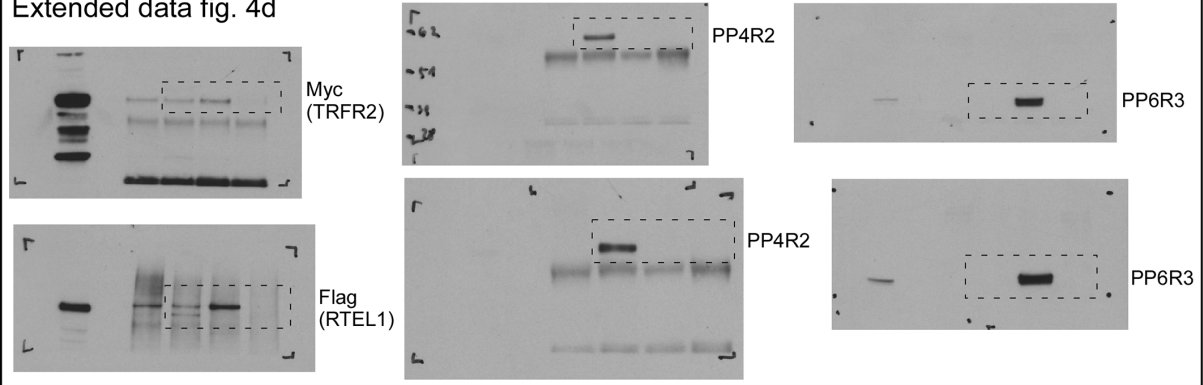

Extended data fig. 5a

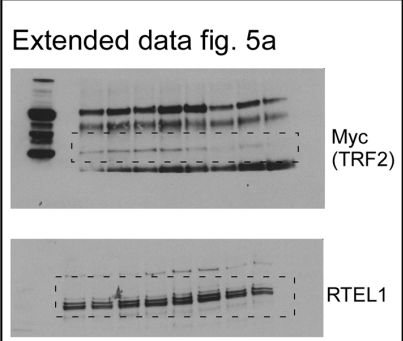

Extended data fig. 5b

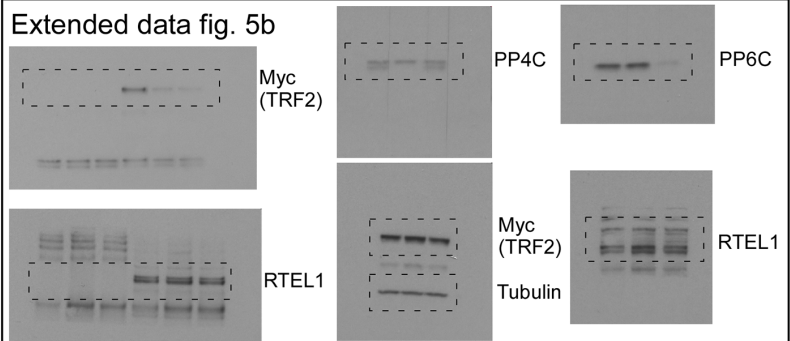

Extended data fig. 5c

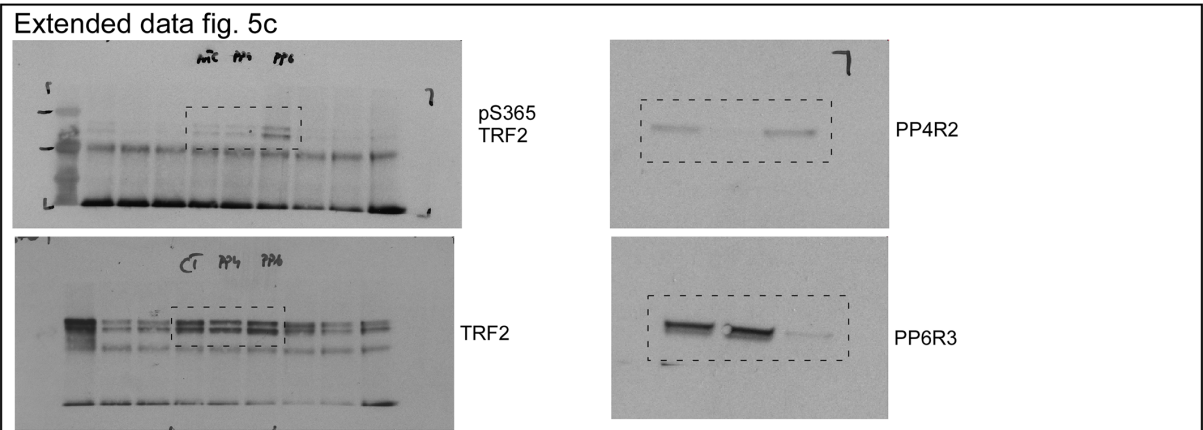

Extended data fig. 5d

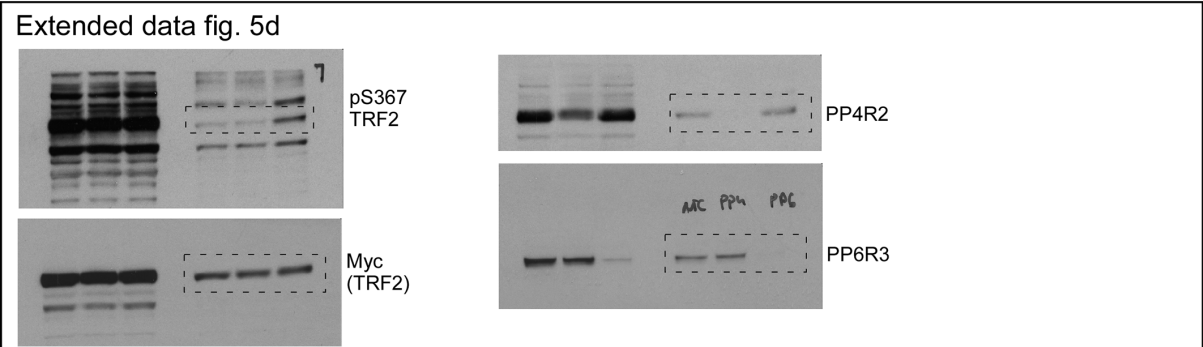

Extended data fig. 5e

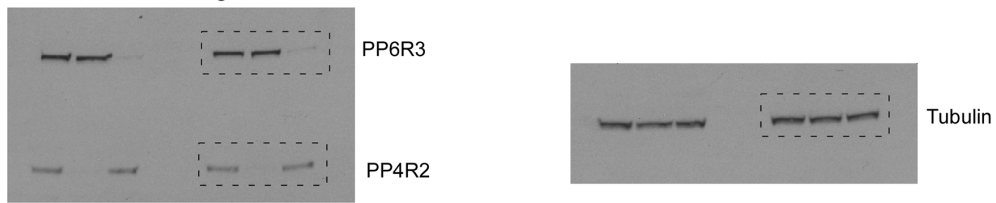

Extended data fig. 5f

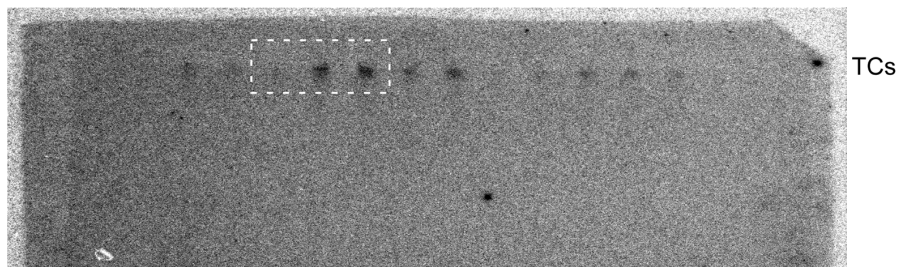

Extended data fig. 8a

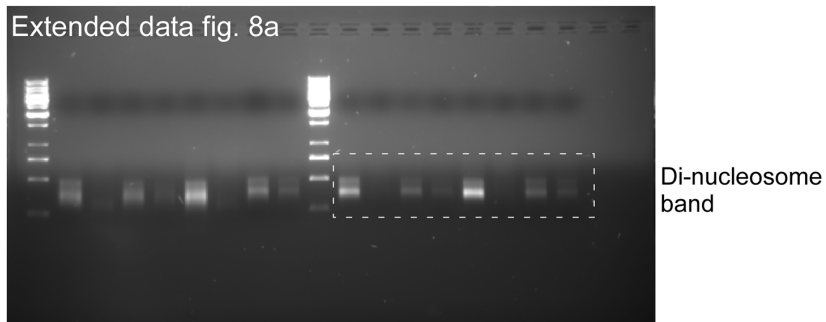

**Supplementary Table 1. List of antibodies used in the paper**

|                                                                     |                           |                    |
|---------------------------------------------------------------------|---------------------------|--------------------|
| Donkey Anti-Rabbit IgG (H+L) Antibody, Alexa Fluor488 Conjugated    | Thermo Fisher             | Cat# A-21206       |
| Goat Anti-Rat IgG (H+L) Antibody, Alexa Fluor594 Conjugated         | Thermo Fisher             | Cat# A-11007       |
| Mouse Anti-BrdU Monoclonal Antibody, FITC Conjugated, Clone B44     | BD Biosciences            | Cat# 347583        |
| Mouse monoclonal anti-53BP1                                         | BD Bioscience             | Cat# 612523        |
| Mouse monoclonal anti-ERK1/2 (C-9)                                  | Santa Cruz                | Cat# sc-514302     |
| Mouse monoclonal anti-Myc                                           | Abcam                     | Cat# ab-32         |
| Mouse Monoclonal anti-PCNA                                          | Santa Cruz Biotechnology  | Cat# sc-56         |
| Mouse monoclonal anti-TRF1                                          | Abcam                     | Cat# ab-10579      |
| Mouse Monoclonal anti-Tubulin                                       | Sigma-Aldrich             | Cat# T6074         |
| Mouse monoclonal anti-Vinculin                                      | Sigma                     | Cat# V9131         |
| Mouse monoclonal anti- $\gamma$ H2AX                                | Millipore                 | Cat# 05-636        |
| Peroxidase-conjugated Goat anti-Mouse IgG (H+L)                     | Thermo Fisher Scientific  | Cat# G-21040;      |
| Peroxidase-conjugated Goat anti-Rabbit IgG (H+L)                    | Thermo Fisher Scientific  | Cat# G-21234       |
| Peroxidase-conjugated Polyclonal Goat Anti-Rabbit Immunoglobulins   | Dako                      | Cat#P0448          |
| Peroxidase-conjugated Polyclonal Goat Anti-Rabbit Immunoglobulins   | Dako                      | Cat#P0447          |
| Rabbit Anti-Mouse IgG (H+L) Antibody, Alexa Fluor488 Conjugated     | Thermo Fisher             | Cat# A-11059       |
| Rabbit monoclonal anti-Phospho-p44/42 MAPK (Erk1/2) (Thr202/Tyr204) | Cell Signaling            | Cat# 4370          |
| Rabbit monoclonal anti-TRF2                                         | Cell Signaling Technology | Cat# 13136         |
| Rabbit polyclonal anti-53BP1                                        | Novus Biologicals         | Cat# NB100-304     |
| Rabbit polyclonal anti-Cyclin D1                                    | Cell Signaling Technology | Cat# 2922          |
| Rabbit polyclonal anti-Cyclin E                                     | Santa Cruz Biotechnology  | Cat# sc-247        |
| Rabbit polyclonal anti-HA                                           | Abcam                     | Cat# ab-9110       |
| Rabbit polyclonal anti-Myc                                          | Sigma                     | Cat# c-3956        |
| Rabbit polyclonal anti-Phospho Histone H3 (Ser10)                   | Cell Signaling Technology | Cat# 9701          |
| Rabbit polyclonal anti-PP1R10                                       | Abcam                     | Cat# ab-134291     |
| Rabbit polyclonal anti-PP2R5C                                       | Abcam                     | Cat# ab-94633      |
| Rabbit polyclonal anti-PP4C                                         | Abcam                     | Cat# ab-16475      |
| Rabbit polyclonal anti-PP4R1                                        | Abcam                     | Cat# ab-70624      |
| Rabbit polyclonal anti-PP4R2                                        | Abcam                     | Cat# ab-70631      |
| Rabbit polyclonal anti-PP6C                                         | Abcam                     | Cat# ab-131335     |
| Rabbit polyclonal anti-PP6R2                                        | Abcam                     | Cat# ab-72032      |
| Rabbit polyclonal anti-PP6R3                                        | Millipore                 | Cat# 071381        |
| Rabbit polyclonal anti-PP6R3                                        | Bethyl                    | Cat# A300-971A     |
| Rabbit polyclonal anti-PP6R3                                        | Aviva Systems             | Cat# ARP62362_P050 |
| Rabbit polyclonal anti-Rap1                                         | Bethyl                    | Cat# A300-306A     |
| Rabbit polyclonal anti-RTEL1                                        | Novus Biologicals         | Cat# NBP2-22360    |

|                                                              |                              |                  |
|--------------------------------------------------------------|------------------------------|------------------|
| Rabbit polyclonal anti-SMC3                                  | Abcam                        | Cat# ab-9263     |
| Rabbit polyclonal anti-TRF1                                  | Abcam                        | Cat# ab-1423     |
| Rabbit polyclonal anti-TRF2                                  | Cell Signaling<br>Technology | Cat# 2645        |
| Rabbit polyclonal anti-TRF2                                  | Novus Biologicals            | Cat# NB100-56694 |
| Rabbit polyclonal anti-TRF2                                  | Millipore                    | Cat# 05-521      |
| Rabbit polyclonal anti-TRF2                                  | Santa Cruz<br>Biotechnology  | Cat# sc-9143     |
| Rabbit polyclonal anti-TRF2                                  | Novus Biologicals            | Cat# NB110-57130 |
| Rabbit polyclonal anti-UBLCP1                                | Novus Biologicals            | Cat# NBP1-85468  |
| Rabbit polyclonal recognizing<br>human Phospho TRF2 (Ser365) | This paper                   | N/A              |
| Rabbit polyclonal recognizing<br>mouse Phospho TRF2 (Ser367) | This paper                   | N/A              |
| Rat polyclonal anti-BrdU                                     | Santa Cruz<br>Biotechnology  | Cat# sc-56258    |



**Supplementary Table 2. List of oligonucleotides used in the paper**

|                                                |               |                                                                                                              |
|------------------------------------------------|---------------|--------------------------------------------------------------------------------------------------------------|
| Amino acid substitution mutant RTEL1R1237H     | Sigma-Aldrich | 5'cctgtgacttctaccactgttgggctgttg3'<br>5'caacaggcccaacagtggtagaagtccacagg3'                                   |
| Amino acid substitution mutant TRF2S367A       | Sigma-Aldrich | 5'gtttgtgggctggctgatggggatgccag3'<br>5'ctggcatcccatcagcaccagccacaaac3'                                       |
| Amino acid substitution mutant TRF2S367D       | Sigma-Aldrich | 5'tgtttgtgggctggatctgatggggatgccagattagc<br>aagtac3'<br>5'gtacttgctaactctggcatcccatcagatccagccca<br>caaaca3' |
| Amino acid substitution mutant TRF2S367E       | Sigma-Aldrich | 5'tgtttgtgggctggctctgatggggatgccagattagc<br>aagtac3'<br>5'gtacttgctaactctggcatcccatcagagccagccc<br>acaaaca3' |
| Non-targeting Pool Accel                       | Dharmacon     | Cat# D-001910-10-05                                                                                          |
| Non-targeting Pool ON-TARGETplus               | Dharmacon     | Cat# D-001810-10-05                                                                                          |
| SMARTpool: Accell Ppp4r2 (mouse) siRNA         | Dharmacon     | Cat# E-056976-00-0010                                                                                        |
| SMARTpool: Accell Ppp6r3 (mouse) siRNA         | Dharmacon     | Cat# E-040027-00-0010                                                                                        |
| SMARTpool: ON-TARGETplus PPP1R10 (human) siRNA | Dharmacon     | Cat# L-011358-00-0010                                                                                        |
| SMARTpool: ON-TARGETplus PPP4C (human) siRNA   | Dharmacon     | Cat# L-008486-00-0010                                                                                        |
| SMARTpool: ON-TARGETplus PPP4R1 (human) siRNA  | Dharmacon     | Cat# L-019912-00-0010                                                                                        |
| SMARTpool: ON-TARGETplus PPP4R2 (human) siRNA  | Dharmacon     | Cat# L-017750-00-0010                                                                                        |
| SMARTpool: ON-TARGETplus PPP6C (human) siRNA   | Dharmacon     | Cat# L-009935-00-0010                                                                                        |
| SMARTpool: ON-TARGETplus PPP6R2 (human) siRNA  | Dharmacon     | Cat# L-021331-01-0010                                                                                        |
| SMARTpool: ON-TARGETplus PPP6R3 (human) siRNA  | Dharmacon     | Cat# L-014646-01-0010                                                                                        |
| SMARTpool: ON-TARGETplus Terf2ip (mouse) siRNA | Dharmacon     | Cat# L-050184-01-0005                                                                                        |
| SMARTpool: ON-TARGETplus UBLCP1 (human) siRNA  | Dharmacon     | Cat# L-016328-02-0010                                                                                        |
